# Supplementary material for: Targeting N-Glycan Cryptic Sugar Moieties for Broad-Spectrum Virus Neutralization: Progress in Identifying Conserved Molecular Targets in Viruses of Distinct Phylogenetic Origins
Source: PubMed Central journal article supplement (PMC4633014; doi:10.3390/molecules20034610), 2015-03-12
Supplement: NIHMS734106-supplement-S1.pdf [file NIHMS734106-supplement-S1.pdf]

## Supplementary Materials

**Table S1.** Antigen preparations used in microarray studies.

| Antigen Name | Antgen Preparations *             | Description                                                                                           | Source                                                          | References |
|--------------|-----------------------------------|-------------------------------------------------------------------------------------------------------|-----------------------------------------------------------------|------------|
| OR           | OR, 0.5 mg/mL                     | Orosomuroid (human $\alpha$ 1-acid glycoprotein)                                                      | Sigma-Aldrich                                                   | [1]        |
| ASOR         | ASOR, 0.5 mg/mL                   | Asialo-orosomuroid                                                                                    | From the late Prof. Elvin A. Kabat (Columbia University)        | [1]        |
| AGOR         | AGOR, 0.5 mg/mL                   | Agalacto-orosomuroid                                                                                  | From the late Prof. Elvin A. Kabat (Columbia University)        | [1]        |
| KLH-SH       | KLH-SH, 0.5 mg/mL                 | Thiolated keyhole limpet hemocyanin                                                                   | Present authors                                                 | [2]        |
| Man9         | Man9-KLH, 0.5 mg/mL               | (Man9GlcNAc2Asn) <sub>n</sub> -KLH                                                                    | Present authors                                                 | [2]        |
| M9(2G12)     | Man9-Cluster(2G12)-KLH, 0.5 mg/mL | [(Man9GlcNAc2Asn) <sub>4</sub> ] <sub>n</sub> -KLH                                                    | Present authors                                                 | [2]        |
| E. coli. K1  | E. coli. K1 CP, 0.5 mg/mL         | E. coli K1 capsular polysaccharide (CP)                                                               | From the late Prof. Elvin A. Kabat (Columbia University)        | [3]        |
| Man5_6-RB    | Man 5-6 RB, 0.5 mg/mL             | Ribonuclease B with Man <sub>5,6</sub> GlcNAc <sub>2</sub> Asn as the main glycans (pancreas, bovine) | Sigma-Aldrich                                                   | [4]        |
| P-Man        | B2448, 0.5 mg/mL                  | Phosphomannan, NRRL B-2448                                                                            | Northern Regional research laboratory, (Peoria, IL) NRRL B-2448 | [3]        |
| B1299S       | B1299S, 0.5 mg/mL                 | $\alpha$ (1→6)dextran, NRRL B-1299S                                                                   | Northern Regional research laboratory, (Peoria, IL) NRRL B-2448 | [5]        |
| B1355S       | B1355S, 0.5 mg/mL                 | $\alpha$ (1→3)(1→6)dextran, NRRL B-1355S                                                              | Northern Regional research laboratory, (Peoria, IL) NRRL B-2448 | [5]        |
| Levan        | Levan, 0.5 mg/mL                  | Levan (from preparation of B-512-E dextran)                                                           | Commercial Solvents Co. (Terre Haute, IN)                       | [3]        |
| N279         | N279, 0.5 mg/mL                   | $\alpha$ (1→6)dextran, NRRL N279                                                                      | Northern Regional research laboratory, (Peoria, IL) NRRL B-2448 | [5]        |

Table S1. Cont.

| Antigen Name          | Antgen Preparations *                  | Description                                                              | Source                                                    | References |
|-----------------------|----------------------------------------|--------------------------------------------------------------------------|-----------------------------------------------------------|------------|
| Bacto-Agar            | Bacto-Agar, 0.5 mg/mL                  | Bacto-agar 20°C extract                                                  | From the late Prof. Elvin A. Kabat (Columbia University)  | [6]        |
| E. coli. 5014         | E. coli. LPS 5014, 0.5 mg/mL           | Lipopolysaccharides (rough strains) from Escherichia coli J5 (Rc mutant) | Sigma-Aldrich                                             | [4]        |
| E. coli. 2630         | E. coli. LPS 2630, 0.5 mg/mL           | Lipopolysaccharides from Escherichia coli 0111:B4                        | Sigma-Aldrich                                             | [4]        |
| E. coli. K100         | E. coli. K100 CP, 0.5 mg/mL            | E. coli K100 capsular polysaccharide (CP)                                | From the late Prof. Elvin A. Kabat (Columbia University)  | [3]        |
| E. coli. K92          | E. coli. K92 CP, 0.5 mg/mL             | E. coli K92 capsular polysaccharide                                      | From the late Prof. Elvin A. Kabat (Columbia University)  | [3]        |
| S. dysenterine type 1 | S. dysenterine type I O-SP, 0.5 mg/mL  | Shigella dysenteriae Type 1 O-specific polysaccharide                    | From Drs. John Robbins and Rachel Schneerson (NICHD, NIH) | [7]        |
| S.typhi LPS           | S.typhi LPS7261, 0.5 mg/mL             | Lipopolysaccharides from Salmonella enterica serotype typhimurium L7261  | Sigma-Aldrich                                             | [4]        |
| Sulfatide             | Sulfatide, 2.0 mg/mL                   | Sufatides (Cerebroside sulfates), (Brain, Porcine)                       | Avanti Polar lipids, Alabaster, AL, USA                   | [4]        |
| Ganglioside           | Ganglioside, 2.0mg/mL                  | Total Ganglioside-Ammonium Salt, (Brain, Porcine)                        | Avanti Polar lipids, Alabaster, AL, USA                   | [4]        |
| Ceremide              | Ceremide, 2.0 mg/mL                    | Ceramide (Brain, Porcine)                                                | Avanti Polar lipids, Alabaster, AL, USA                   | [4]        |
| DIMPS                 | DIMPS, 2 mg/mL                         | 1,2-Dimyristoyl-sn-Glycero—3—[phospho-L—serine](Sodium Salt) (DMPS)      | Avanti Polar lipids, Alabaster, AL, USA                   | [4]        |
| GM1/PTC_0.02/2.0      | GM1/PTC, 0.02 mg/2 mg/mL, 4 °C, 24 h   | GM1 Ganglioside-Sodium Salt (Brain, Ovine)                               | Avanti Polar lipids, Alabaster, AL, USA                   | [4]        |
| GM1/PTC_0.2/2.0       | GM1/PTC, 2 mg/2 mg/mL, 4 °C, 14 Months | GM1 Ganglioside-Sodium Salt (Brain, Ovine)                               | Avanti Polar lipids, Alabaster, AL, USA                   | [4]        |

Table S1. Cont.

| Antigen Name                  | Antgen Preparations *                                        | Description                                                         | Source                                     | References |
|-------------------------------|--------------------------------------------------------------|---------------------------------------------------------------------|--------------------------------------------|------------|
| Ganglioside/PTC_0.2/2.0       | Ganglioside/PTC,<br>0.2 mg/2 mg/mL, 4 °C, 24 h               | Total Ganglioside Extract (Brain, Porcine-Ammnium Salt)             | Avanti Polar lipids,<br>Alabaster, AL, USA | [4]        |
| Erythrospingosine/PTC_0.2/2.0 | Erythrospingosine/PTC,<br>0.2mg/2.0mg/mL, 4°C, 24 h          | D-erythro- Sphingosine (Egg, Chicken)                               | Avanti Polar lipids,<br>Alabaster, AL, USA | [4]        |
| Phytosphingosine/PTC_0.2/2.0  | Phytosphingosine/PTC,<br>0.2 mg/2.0 mg/mL, 4 °C, 24 h        | Phytosphingosine 4-Hydroxysphinganine<br>(Saccharomyces cerevisiae) | Avanti Polar lipids,<br>Alabaster, AL, USA | [4]        |
| Glucocerebroside/PTC_0.2/2.0  | Glucocerebroside/PTC,<br>0.2 mg/2 mg/mL, 4 °C, 24 h          | Glucocerebrosides (Soy, 98%)                                        | Avanti Polar lipids,<br>Alabaster, AL, USA | [4]        |
| Sulfatide/PTC_0.2/2.0         | Sulfatide/PTC,<br>0.2 mg/2.0 mg/mL, 4 °C, 24 h               | Sufatides (Cerebroside sulfates) (Brain, Porcine)                   | Avanti Polar lipids,<br>Alabaster, AL, USA | [4]        |
| Ceremide/PTC_0.2/2.0          | Ceremide/PTC,<br>0.2 mg/2.0mg/mL, 4°C, 24 h                  | Ceramide (Brain, Porcine)                                           | Avanti Polar lipids,<br>Alabaster, AL, USA | [4]        |
| Cerebroside/PTC_0.2/2.0       | Cerebroside/PTC,<br>0.2 mg/2.0 mg/mL, 4 °C, 24 h             | Total Cerebrosides (Brain, Porcine)                                 | Avanti Polar lipids,<br>Alabaster, AL, USA | [4]        |
| DMPS/PTC_0.2/2.0              | DMPS/PTC, 0.2mg/2.0mg/mL,<br>4 °C, 24 h                      | 1,2-Dimyristoyl-sn-Glycero—3—[phospho-L—serine](Sodium Salt) (DMPS) | Avanti Polar lipids,<br>Alabaster, AL, USA | [4]        |
| Cardiolipin/PTC_0.4/2.0_D1    | Cardiolipin/PTC,<br>0.4 mg/2 mg/mL, 4 °C, 24 h               | Cardiolipin-Disodium Salt (heart, bovin)                            | Sigma Chemical Co., St.<br>Louis, MO, USA  | [4]        |
| Cardiolipin/PTC_0.1/2.0 D1    | Cardiolipin/PTC,<br>0.1 mg/2 mg/mL, 4 °C, 24 h               | Cardiolipin-Disodium Salt (heart, bovin)                            | Sigma Chemical Co., St.<br>Louis, MO, USA  | [4]        |
| Cardiolipin/PTC_0.4/2.0 4M    | Cardiolipin/PTC,<br>0.4 mg/2 mg/mL, 4 °C, 4 Months           | Cardiolipin-Disodium Salt (heart, bovin)                            | Sigma Chemical Co., St.<br>Louis, MO, USA  | [4]        |
| Cardiolipin/PTC_0.1/2.0 4M    | Cardiolipin/PTC,<br>0.1 mg/2 mg/mL, 4°C, 4 Months            | Cardiolipin-Disodium Salt (heart, bovin)                            | Sigma Chemical Co., St.<br>Louis, MO, USA  | [4]        |
| Cardiolipin/PTC_0.02/2.0 4M   | Cardiolipin/PTC,<br>0.02 mg/2 mg/mL, 4 °C, 4 Months          | Cardiolipin (C1649)                                                 | Sigma Chemical Co., St.<br>Louis, MO, USA  | [4]        |
| aGal-T2/PTC_0.04/2.0          | Galal,3Galb1-**HDPE/PTC,<br>0.04 mg/2 mg/mL, 4 °C, 12 Months | Galal,3Galb1-HDPE (aGal-terminal di-saccharides)                    | V-LABS, INC, Covington,<br>LA, USA         | [4]        |

Table S1. Cont.

| Antigen Name             | Antgen Preparations *                            | Description                                                                               | Source                                                        | References |
|--------------------------|--------------------------------------------------|-------------------------------------------------------------------------------------------|---------------------------------------------------------------|------------|
| Lactosamine/PTC_0.04/2.0 | Galbl,4GlcNACb1-HDPE/PTC, 4 °C, 12 Months        | Galbl,4GlcNACb1-HDPE (Type II chain unit)                                                 | V-LABS, INC, Covington, LA, USA                               | [4]        |
| aGal-T3/PTC_0.04/2.0     | Galal,3Galbl,4GlcNACb1-HDPE/PTC, 4 °C, 12 Months | Galal,3Galbl,4GlcNACbl-(aGal-terminal di-saccharides)-HDPE                                | V-LABS, INC, Covington, LA, USA                               | [4]        |
| PLP139-150               | PLP139-150, 1mg/mL                               | A synthetic peptide of human Myelin Proteolipid Protein (PLP), Amino acid residue 139-150 | Present authors                                               | [4]        |
| PTC_D1 2.0               | PTC 2.0 mg/mL, 4 °C, 24 h                        | L-a-Phosphatidylcholine (Egg, Chicken)                                                    | Avanti Polar lipids, Alabaster, AL, USA                       | [4]        |
| PTC_4M 2.0               | PTC 2.0 mg/mL, 4 °C, 4 Months                    | L-a-Phosphatidylcholine (Egg, Chicken)                                                    | Avanti Polar lipids, Alabaster, AL, USA                       | [4]        |
| PTC_12M 2.0              | PTC 2.0 mg/mL, 4 °C, 12 Months                   | L-a-Phosphatidylcholine (Egg, Chicken)                                                    | Avanti Polar lipids, Alabaster, AL, USA                       | [4]        |
| PTC_14M 2.0              | PTC 2.0 mg/mL, 4 °C, 14 Months                   | L-a-Phosphatidylcholine (Egg, Chicken)                                                    | Avanti Polar lipids, Alabaster, AL, USA                       | [4]        |
| MBP1-11                  | MBP1-11, 1 mg/mL                                 | A synthetic peptide of human myelin basic protein(MBP), N-terminal amino acid 1-11        | Present authors                                               | [8]        |
| mMBP                     | mMBP, 0.5 mg/mL                                  | Myelin Basic Protein (Brain, Murine)                                                      | ACCURATE CHEMICAL & SCIENTIFIC CORPORATION, WESTBURY, NY, USA | [8]        |
| hMBP                     | hMBP, 0.5 mg/mL in 10 mM HCl                     | Myelin Basic Protein, iodination grade (Brain, Human)                                     | ACCURATE CHEMICAL & SCIENTIFIC CORPORATION, WESTBURY, NY, USA | [8]        |
| M0G                      | M0G, 1 mg/mL                                     | Myelin Oligodendrocyte Glycoprotein (Brain, Human)                                        | ACCURATE CHEMICAL & SCIENTIFIC CORPORATION, WESTBURY, NY, USA | [8]        |

\* The antigen concentrations for initial microarray spotting were listed. The subsequent dilutions of each antigens were specified in Supplementary Table S2, Figures 2 and 3;

\*\* HDPE: Neoglycolipids-1,2-di-O-hexadecyl-sn-glycero-3—phosphoethanolamine.

## References

1. Wang, D.; Lu, J. Glycan arrays lead to the discovery of autoimmunogenic activity of SARS-CoV. *Physiol. Genomics* **2004**, *18*, 245–248. *Physiol. Genomics* **2004**, *18*, 245–248.
2. N, J.; Song, H.; Wang, Y.; Stamatou, N.M.; Wang, L.X. Toward a carbohydrate-based HIV-1 vaccine: Synthesis and immunological studies of oligomannose-containing glycoconjugates. *Bioconjug. Chem.* **2006**, *17*, 493–500.
3. Kabat, E.A.; Nickerson, K.G.; Liao, J.; Grossbard, L.; Osserman, E.F.; Glickman, E.; Chess, L.; Robbins, J.B.; Schneerson, R.; Yang, Y.H. A human monoclonal macroglobulin with specificity for alpha(2----8)-linked poly-N-acetyl neuraminic acid, the capsular polysaccharide of group B meningococci and Escherichia coli K1, which crossreacts with polynucleotides and with denatured DNA. *J. Exp. Med.* **1986**, *164*, 642–654.
4. Wang, D.; Bhat, R.; Sobel, R.A.; Huang, W.; Wang, L.X.; Olsson, T.; Steinman, L. Uncovering Cryptic Glycan Markers in Multiple Sclerosis (MS) and Experimental Autoimmune Encephalomyelitis (EAE). *Drug Dev. Res.* **2004**, *75*, 172–188.
5. Wang, D.; Liu, S.; Trummer, B.J.; Deng, C.; Wang, A. Carbohydrate microarrays for the recognition of cross-reactive molecular markers of microbes and host cells. *Nat. Biotechnol.* **2002**, *20*, 275–281.
6. Duckworth, M.; Yaphe, W. The structure of agar: Part I. Fractionation of a complex mixture of polysaccharides. *Carbohydr. Res.* **1971**, *16*, 189–197.
7. Pozsgay, V.; Kubler-Kielb, J.; Schneerson, R.; Robbins, J.B. Effect of the nonreducing end of Shigella dysenteriae type 1 O-specific oligosaccharides on their immunogenicity as conjugates in mice. *Proc. Natl. Acad. Sci. USA* **2007**, *104*, 14478–14482.
8. Robinson, W.H.; DiGennaro, C.; Hueber, W.; Haab, B.B.; Kamachi, M.; Dean, E.J.; Fournel, S.; Fong, D.; Genovese, M.C.; de Vegvar, H.E.; *et al.* Autoantigen microarrays for multiplex characterization of autoantibody responses. *Nat. Med.* **2002**, *8*, 295–301.
