# Supplementary material for: Targeting N-Glycan Cryptic Sugar Moieties for Broad-Spectrum Virus Neutralization: Progress in Identifying Conserved Molecular Targets in Viruses of Distinct Phylogenetic Origins
Source: PubMed Central journal article supplement (PMC4633014; doi:10.3390/molecules20034610), 2015-03-12
Supplement: NIHMS734106-supplement-S2.pdf [file NIHMS734106-supplement-S2.pdf]

Supplementary Table S2. Antigen preparations and microarray data for Figures 2 and 3.

| ID# | Antigens (mg/ml)                  | *Antigen classes | Repeats | PHA-L Mean | PHA-L Std Dev | PHA-L Bg | PHA-L Bg Std Dev | PHA-L Ag/Bg | GNA Mean | GNA Std Dev | GNA Bg | GNA Bg Std Dev | GNA Ag/Bg    | 2G12 Mean | 2G12 Std Dev | 2G12 Bg | 2G12 Bg Std Dev | 2G12 Ag/Bg   |
|-----|-----------------------------------|------------------|---------|------------|---------------|----------|------------------|-------------|----------|-------------|--------|----------------|--------------|-----------|--------------|---------|-----------------|--------------|
| 1   | OR 0.5                            | I (*)            | 3       | 1688       | 13            | 1688     | 5                | 1.00        | 1513     | 7           | 1401   | 30             | 1.08         | 406       | 8            | 405     | 10              | 1.00         |
| 2   | OR 0.1                            | I (*)            | 3       | 1665       | 29            | 1695     | 1                | 0.98        | 1511     | 21          | 1404   | 24             | 1.08         | 427       | 41           | 407     | 12              | 1.05         |
| 3   | ASOR 0.5                          | I (*)            | 3       | 10,556     | 718           | 1716     | 17               | <b>6.15</b> | 1801     | 110         | 1437   | 30             | 1.25         | 409       | 4            | 404     | 8               | 1.01         |
| 4   | ASOR 0.1                          | I (*)            | 3       | 1918       | 18            | 1742     | 25               | 1.10        | 1550     | 16          | 1457   | 12             | 1.06         | 408       | 7            | 406     | 5               | 1.01         |
| 5   | AGOR 0.5                          | I (*)            | 3       | 2476       | 62            | 1778     | 9                | 1.39        | 47,082   | 1348        | 1548   | 21             | <b>30.41</b> | 431       | 9            | 408     | 4               | 1.06         |
| 6   | AGOR 0.1                          | I (*)            | 3       | 1864       | 50            | 1800     | 16               | 1.04        | 5528     | 374         | 1569   | 3              | <b>3.52</b>  | 414       | 3            | 415     | 1               | 1.00         |
| 7   | KLH-SH 0.5                        | I                | 3       | 1777       | 10            | 1793     | 15               | 0.99        | 1730     | 26          | 1567   | 14             | 1.10         | 423       | 9            | 410     | 5               | 1.03         |
| 8   | KLH-SH 0.1                        | I                | 3       | 1807       | 17            | 1815     | 9                | 1.00        | 1678     | 58          | 1544   | 21             | 1.09         | 410       | 1            | 409     | 5               | 1.00         |
| 9   | Man9-KLH 0.5                      | I (*)            | 3       | 2408       | 140           | 1854     | 18               | 1.30        | 10,055   | 600         | 1488   | 38             | <b>6.76</b>  | 2043      | 189          | 410     | 2               | <b>4.98</b>  |
| 10  | Man9-KLH 0.1                      | I (*)            | 3       | 1948       | 25            | 1883     | 38               | 1.03        | 3083     | 78          | 1491   | 60             | <b>2.07</b>  | 668       | 6            | 409     | 6               | 1.63         |
| 11  | (M9)4-KLH 0.5                     | I (*)            | 3       | 3445       | 606           | 2003     | 50               | 1.72        | 10,495   | 694         | 1581   | 73             | <b>6.64</b>  | 5792      | 195          | 416     | 6               | <b>13.94</b> |
| 12  | (M9)4-KLH 0.1                     | I (*)            | 3       | 1877       | 34            | 1894     | 48               | 0.99        | 2646     | 128         | 1670   | 59             | 1.58         | 518       | 5            | 408     | 6               | 1.27         |
| 13  | E. coli. K1 0.5                   | I                | 3       | 1827       | 5             | 1858     | 7                | 0.98        | 1747     | 13          | 1602   | 11             | 1.09         | 407       | 4            | 402     | 8               | 1.01         |
| 14  | E. coli. K1 0.1                   | I                | 3       | 2066       | 322           | 1837     | 17               | 1.12        | 1823     | 67          | 1672   | 74             | 1.09         | 400       | 2            | 402     | 2               | 1.00         |
| 15  | Man5-6-RB 0.5                     | I (*)            | 3       | 2696       | 224           | 1838     | 88               | 1.47        | 8282     | 322         | 1712   | 46             | <b>4.84</b>  | 421       | 12           | 399     | 4               | 1.06         |
| 16  | Man5-6-RB 0.1                     | I (*)            | 3       | 1794       | 7             | 1794     | 10               | 1.00        | 2275     | 30          | 1603   | 38             | 1.42         | 407       | 14           | 396     | 4               | 1.03         |
| 17  | P-Man 0.5                         | I                | 3       | 2565       | 153           | 1893     | 24               | 1.35        | 57,780   | 1019        | 1598   | 64             | <b>36.15</b> | 414       | 18           | 401     | 12              | 1.03         |
| 18  | P-Man 0.1                         | I                | 3       | 2485       | 108           | 1875     | 15               | 1.33        | 31,144   | 823         | 1662   | 44             | <b>18.74</b> | 408       | 8            | 400     | 2               | 1.02         |
| 19  | B1299S 0.5                        | I                | 3       | 1830       | 18            | 2157     | 244              | 0.85        | 1934     | 87          | 1756   | 40             | 1.10         | 402       | 5            | 402     | 4               | 1.00         |
| 20  | B1299S 0.1                        | I                | 3       | 1873       | 35            | 1899     | 5                | 0.99        | 1959     | 40          | 1782   | 8              | 1.10         | 403       | 1            | 403     | 3               | 1.00         |
| 21  | B1355S 0.5                        | I                | 3       | 2006       | 9             | 1868     | 11               | 1.07        | 1959     | 87          | 1685   | 62             | 1.16         | 408       | 3            | 402     | 7               | 1.01         |
| 22  | B1355S 0.1                        | I                | 3       | 1881       | 22            | 1880     | 9                | 1.00        | 1839     | 58          | 1689   | 59             | 1.09         | 402       | 3            | 402     | 5               | 1.00         |
| 23  | Levan 0.5                         | I                | 3       | 1788       | 26            | 1801     | 23               | 0.99        | 2006     | 113         | 1833   | 156            | 1.09         | 420       | 16           | 441     | 39              | 0.95         |
| 24  | Levan 0.1                         | I                | 3       | 1764       | 12            | 1784     | 16               | 0.99        | 1757     | 79          | 1689   | 88             | 1.04         | 426       | 22           | 471     | 76              | 0.90         |
| 25  | N279 0.5                          | I                | 3       | 1849       | 51            | 1770     | 27               | 1.04        | 1828     | 70          | 1619   | 59             | 1.13         | 403       | 5            | 394     | 7               | 1.02         |
| 26  | N279 0.1                          | I                | 3       | 1780       | 14            | 1799     | 19               | 0.99        | 1825     | 79          | 1699   | 63             | 1.07         | 396       | 10           | 397     | 6               | 1.00         |
| 27  | Bacto-Agar 0.5                    | I                | 3       | 1929       | 19            | 1793     | 5                | 1.08        | 2658     | 117         | 1577   | 15             | 1.69         | 410       | 11           | 403     | 2               | 1.02         |
| 28  | E. coli. 5014 0.5                 | I                | 3       | 1777       | 6             | 1808     | 6                | 0.98        | 1601     | 16          | 1527   | 23             | 1.05         | 395       | 7            | 395     | 0               | 1.00         |
| 29  | E. coli. 5014 0.1                 | I                | 3       | 1777       | 15            | 1792     | 15               | 0.99        | 1626     | 23          | 1526   | 16             | 1.07         | 393       | 5            | 398     | 2               | 0.99         |
| 30  | E. coli. 2630 0.5                 | I                | 3       | 1790       | 11            | 1799     | 13               | 0.99        | 1833     | 208         | 1530   | 17             | 1.20         | 400       | 5            | 404     | 8               | 0.99         |
| 31  | E. coli. 2630 0.1                 | I                | 3       | 1851       | 60            | 1829     | 27               | 1.01        | 1626     | 56          | 1523   | 30             | 1.07         | 394       | 6            | 396     | 9               | 0.99         |
| 32  | E. coli. K100 0.5                 | I                | 3       | 1870       | 28            | 1739     | 7                | 1.08        | 2045     | 75          | 1462   | 20             | 1.40         | 420       | 2            | 414     | 5               | 1.01         |
| 33  | E. coli. K100 0.1                 | I                | 3       | 1751       | 8             | 1756     | 21               | 1.00        | 1618     | 19          | 1480   | 17             | 1.09         | 415       | 6            | 417     | 2               | 0.99         |
| 34  | E. coli. K92 0.5                  | I                | 3       | 1710       | 10            | 1717     | 28               | 1.00        | 1530     | 24          | 1410   | 8              | 1.09         | 402       | 6            | 397     | 4               | 1.01         |
| 35  | E. coli. K92 0.1                  | I                | 3       | 1700       | 8             | 1709     | 10               | 0.99        | 1512     | 24          | 1420   | 17             | 1.06         | 401       | 6            | 401     | 5               | 1.00         |
| 36  | S. dysenteriae 10.5               | I                | 3       | 1809       | 9             | 2011     | 45               | 0.90        | 1565     | 10          | 1513   | 5              | 1.03         | 412       | 16           | 414     | 18              | 1.00         |
| 37  | S. dysenteriae 10.1               | I                | 3       | 1841       | 24            | 1857     | 23               | 0.99        | 1726     | 52          | 1552   | 44             | 1.11         | 399       | 11           | 411     | 9               | 0.97         |
| 38  | S. typhi LPS 0.5                  | I                | 3       | 1835       | 9             | 1870     | 29               | 0.98        | 1575     | 36          | 1479   | 24             | 1.07         | 394       | 4            | 395     | 6               | 1.00         |
| 39  | S. typhi LPS 0.1                  | I                | 3       | 1806       | 7             | 1812     | 2                | 1.00        | 1635     | 36          | 1478   | 17             | 1.11         | 401       | 3            | 396     | 3               | 1.01         |
| 40  | Sulfatide 2.0                     | II (*)           | 3       | 2205       | 32            | 1724     | 46               | 1.28        | 2456     | 127         | 1485   | 12             | 1.65         | 420       | 7            | 414     | 9               | 1.02         |
| 41  | Sulfatide 0.4                     | II (*)           | 3       | 1758       | 16            | 1761     | 17               | 1.00        | 1637     | 19          | 1485   | 16             | 1.10         | 415       | 11           | 410     | 7               | 1.01         |
| 42  | Ganglioside 2.0                   | II (*)           | 3       | 1640       | 30            | 1692     | 2                | 0.97        | 1528     | 28          | 1434   | 17             | 1.07         | 435       | 25           | 417     | 8               | 1.04         |
| 43  | Ganglioside 0.4                   | II (*)           | 3       | 1683       | 63            | 1686     | 24               | 1.00        | 1540     | 26          | 1449   | 12             | 1.06         | 421       | 6            | 420     | 13              | 1.00         |
| 44  | Ceremide 2.0                      | II (*)           | 3       | 1728       | 11            | 1763     | 10               | 0.98        | 1559     | 8           | 1464   | 9              | 1.06         | 408       | 4            | 409     | 3               | 1.00         |
| 45  | Ceremide 0.4                      | II (*)           | 3       | 1818       | 133           | 1764     | 23               | 1.03        | 1547     | 20          | 1453   | 10             | 1.06         | 406       | 5            | 405     | 2               | 1.00         |
| 46  | DIMPS 2.0                         | II               | 3       | 1980       | 63            | 1736     | 9                | 1.14        | 1695     | 27          | 1472   | 11             | 1.15         | 409       | 9            | 405     | 11              | 1.01         |
| 47  | DIMPS 0.4                         | II               | 3       | 1746       | 45            | 1742     | 22               | 1.00        | 1615     | 6           | 1511   | 17             | 1.07         | 401       | 7            | 404     | 9               | 0.99         |
| 48  | GM1/PTC 0.02/2.0                  | II (*)           | 3       | 1707       | 48            | 1726     | 47               | 0.99        | 1569     | 5           | 1455   | 18             | 1.08         | 397       | 6            | 396     | 2               | 1.00         |
| 49  | GM1/PTC 0.02/2.0 1:5              | II (*)           | 3       | 1772       | 42            | 1752     | 34               | 1.01        | 1710     | 69          | 1561   | 54             | 1.10         | 391       | 3            | 394     | 3               | 0.99         |
| 50  | GM1/PTC 0.2/2.0                   | II (*)           | 3       | 1746       | 39            | 1778     | 20               | 0.98        | 1664     | 41          | 1549   | 35             | 1.07         | 384       | 4            | 387     | 3               | 0.99         |
| 51  | GM1/PTC 0.2/2.0 1:5               | II (*)           | 3       | 1767       | 19            | 1749     | 6                | 1.01        | 1677     | 25          | 1570   | 13             | 1.07         | 391       | 6            | 387     | 9               | 1.01         |
| 52  | Ganglioside/PTC 0.2/2.0           | II (*)           | 3       | 1707       | 20            | 1726     | 18               | 0.99        | 1820     | 52          | 1699   | 40             | 1.09         | 391       | 6            | 393     | 4               | 1.00         |
| 53  | Ganglioside/PTC 0.2/2.0 1:5       | II (*)           | 3       | 1709       | 18            | 1699     | 15               | 1.01        | 1818     | 25          | 1674   | 34             | 1.09         | 396       | 2            | 391     | 2               | 1.01         |
| 54  | Erythrospingosine/PTC 0.2/2.0     | II               | 3       | 1761       | 29            | 1773     | 20               | 0.99        | 1861     | 54          | 1724   | 38             | 1.08         | 386       | 4            | 384     | 2               | 1.01         |
| 55  | Erythrospingosine/PTC 0.2/2.0 1:5 | II               | 3       | 1724       | 15            | 1739     | 19               | 0.99        | 1803     | 45          | 1675   | 25             | 1.08         | 390       | 4            | 391     | 2               | 1.00         |
| 56  | Phytosphingosine/PTC 0.2/2.0      | II               | 3       | 1743       | 33            | 1948     | 190              | 0.89        | 1852     | 81          | 1727   | 34             | 1.07         | 387       | 6            | 393     | 4               | 0.99         |
| 57  | Phytosphingosine/PTC 0.2/2.0 1:5  | II               | 3       | 1825       | 18            | 1876     | 35               | 0.97        | 1980     | 20          | 1718   | 25             | 1.15         | 395       | 5            | 396     | 4               | 1.00         |
| 58  | Glucocerebroside/PTC 0.2/2.0      | II (*)           | 3       | 1809       | 73            | 1783     | 30               | 1.01        | 2060     | 140         | 1757   | 18             | 1.17         | 397       | 3            | 395     | 5               | 1.00         |
| 59  | Glucocerebroside/PTC 0.2/2.0 1:5  | II (*)           | 3       | 1751       | 30            | 1762     | 33               | 0.99        | 1825     | 3           | 1709   | 13             | 1.07         | 391       | 2            | 396     | 9               | 0.99         |
| 60  | Sulfatide/PTC 0.2/2.0             | II (*)           | 3       | 1787       | 20            | 1745     | 9                | 1.02        | 2140     | 76          | 1730   | 36             | 1.24         | 399       | 6            | 401     | 4               | 1.00         |
| 61  | Sulfatide/PTC 0.2/2.0 1:5         | II (*)           | 3       | 1711       | 9             | 1729     | 7                | 0.99        | 1814     | 61          | 1717   | 35             | 1.06         | 406       | 4            | 408     | 4               | 1.00         |
| 62  | Ceremide/PTC 0.2/2.0              | II (*)           | 3       | 1746       | 25            | 1760     | 32               | 0.99        | 1592     | 49          | 1488   | 38             | 1.07         | 417       | 7            | 416     | 6               | 1.00         |
| 63  | Ceremide/PTC 0.2/2.0 1:5          | II (*)           | 3       | 1726       | 8             | 1759     | 23               | 0.98        | 1594     | 28          | 1480   | 15             | 1.08         | 413       | 9            | 411     | 9               | 1.00         |
| 64  | Cerebroside/PTC 0.2/2.0           | II (*)           | 3       | 1700       | 36            | 1718     | 25               | 0.99        | 1557     | 11          | 1454   | 2              | 1.07         | 411       | 8            | 408     | 8               | 1.01         |
| 65  | Cerebroside/PTC 0.2/2.0 1:5       | II (*)           | 3       | 1659       | 14            | 1697     | 16               | 0.98        | 1605     | 142         | 1467   | 44             | 1.09         | 403       | 9            | 405     | 7               | 1.00         |
| 66  | DMPS/PTC 0.2/2.0                  | II               | 3       | 1646       | 45            | 1679     | 51               | 0.98        | 1653     | 76          | 1525   | 51             | 1.08         | 404       | 6            | 401     | 4               | 1.01         |
| 67  | DMPS/PTC 0.2/2.0 1:5              | II               | 3       | 1731       | 73            | 1759     | 38               | 0.98        | 1613     | 77          | 1493   | 20             | 1.08         | 399       | 3            | 401     | 7               | 0.99         |
| 68  | Cardiolipin/PTC-0.4/2.0 D1        | II (*)           | 3       | 1731       | 56            | 1695     | 48               | 1.02        | 1838     | 102         | 1540   | 68             | 1.19         | 405       | 9            | 398     | 5               | 1.02         |
| 69  | Cardiolipin/PTC-0.4/2.0 D1 1:5    | II (*)           | 3       | 1717       | 34            | 1714     | 12               | 1.00        | 1586     | 20          | 1454   | 23             | 1.09         | 398       | 3            | 398     | 6               | 1.00         |
| 70  | Cardiolipin/PTC-0.1/2.0 D1        | II (*)           | 3       | 1755       | 26            | 1752     | 16               | 1.00        | 1727     | 19          | 1535   | 18             | 1.13         | 414       | 9            | 406     | 6               | 1.02         |
| 71  | Cardiolipin/PTC-0.1/2.0 D1 1:5    | II (*)           | 3       | 1704       | 61            | 1727     | 43               | 0.99        | 1673     | 58          | 1552   | 44             | 1.08         | 403       | 13           | 405     | 5               | 0.99         |
| 72  | Cardiolipin/PTC-0.4/2.0 4M        | II (*)           | 3       | 1821       | 52            | 1773     | 32               | 1.03        | 1988     | 61          | 1644   | 31             | 1.21         | 471       | 42           | 461     | 36              | 1.02         |
| 73  | Cardiolipin/PTC-0.4/2.0 4M 1:5    | II (*)           | 3       | 1844       | 117           | 1745     | 8                | 1.06        | 1737     | 26          | 1602   | 11             | 1.08         | 406       | 5            | 409     | 12              | 0.99         |
| 74  | Cardiolipin/PTC-0.1/2.0 4M        | II (*)           | 3       | 1687       | 13            | 1891     | 276              | 0.89        | 1776     | 150         | 1632   | 59             | 1.09         | 405       | 5            | 402     | 11              | 1.01         |
| 75  | Cardiolipin/PTC-0.1/2.0 4M 1:5    | II (*)           | 3       | 1816       | 142           | 2018     | 268              | 0.90        | 1762     | 107         | 1642   | 88             | 1.07         | 444       | 26           | 451     | 38              | 0.99         |
| 76  | Cardiolipin/PTC 0.02/2.0 4M       |                  |         |            |               |          |                  |             |          |             |        |                |              |           |              |         |                 |              |

Table S2. Cont.

| ID# | Antigens (mg/ml)             | *Antigen classes | Repeats | PHA-L Mean | PHA-L Std Dev | PHA-L Bg | PHA-L Bg Std Dev | PHA-L Ag/Bg | GNA Mean | GNA Std Dev | GNA_Bg | GNA_Bg Std Dev | GNA Ag/Bg | 2G12 Mean | 2G12 Std Dev | 2G12 Bg | 2G12 Bg Std Dev | 2G12 Ag/Bg |
|-----|------------------------------|------------------|---------|------------|---------------|----------|------------------|-------------|----------|-------------|--------|----------------|-----------|-----------|--------------|---------|-----------------|------------|
| 78  | aGal-T2/PTC_0.04/2.0         | II               | 3       | 1781       | 13            | 1757     | 5                | 1.01        | 1864     | 60          | 1740   | 70             | 1.07      | 404       | 26           | 397     | 7               | 1.02       |
| 79  | aGal-T2/PTC_0.04/2.0 1:5     | II               | 3       | 1755       | 69            | 1722     | 7                | 1.02        | 1904     | 34          | 1718   | 77             | 1.11      | 396       | 3            | 394     | 3               | 1.01       |
| 80  | Lactosamine/PTC_0.04/2.0     | II (*)           | 3       | 1706       | 39            | 1868     | 95               | 0.91        | 1989     | 136         | 1690   | 12             | 1.18      | 398       | 6            | 405     | 4               | 0.98       |
| 81  | Lactosamine/PTC_0.04/2.0 1:5 | II (*)           | 3       | 1902       | 139           | 1773     | 27               | 1.07        | 1960     | 62          | 1724   | 16             | 1.14      | 407       | 7            | 406     | 11              | 1.00       |
| 82  | aGal-T3/PTC_0.04/2.0         | II               | 3       | 1695       | 18            | 1704     | 6                | 0.99        | 1742     | 101         | 1663   | 61             | 1.05      | 394       | 3            | 394     | 4               | 1.00       |
| 83  | aGal-T3/PTC_0.04/2.0 1:5     | II               | 3       | 1685       | 7             | 1711     | 4                | 0.99        | 1780     | 50          | 1660   | 30             | 1.07      | 412       | 7            | 401     | 2               | 1.03       |
| 84  | PTC_D1 2.0                   | II (*)           | 3       | 1735       | 32            | 1774     | 27               | 0.98        | 1773     | 104         | 1513   | 20             | 1.17      | 399       | 8            | 399     | 5               | 1.00       |
| 85  | PTC_D1 2.0 1:5               | II (*)           | 3       | 1723       | 60            | 1757     | 41               | 0.98        | 1665     | 74          | 1571   | 66             | 1.06      | 400       | 6            | 397     | 10              | 1.01       |
| 86  | PTC_4M 2.0                   | II (*)           | 3       | 1665       | 55            | 1672     | 20               | 1.00        | 1649     | 49          | 1530   | 43             | 1.08      | 405       | 5            | 404     | 9               | 1.00       |
| 87  | PTC_4M 2.0 1:5               | II (*)           | 3       | 1698       | 14            | 1717     | 16               | 0.99        | 1652     | 73          | 1516   | 40             | 1.09      | 403       | 12           | 400     | 13              | 1.01       |
| 88  | PTC_12M 2.0                  | II (*)           | 3       | 1713       | 16            | 1735     | 3                | 0.99        | 1680     | 38          | 1593   | 11             | 1.05      | 389       | 5            | 392     | 9               | 0.99       |
| 89  | PTC_12M 2.0 1:5              | II (*)           | 3       | 1679       | 7             | 1720     | 13               | 0.98        | 1817     | 25          | 1711   | 28             | 1.06      | 394       | 5            | 395     | 1               | 1.00       |
| 90  | PTC_14M 2.0                  | II (*)           | 3       | 1732       | 25            | 1754     | 22               | 0.99        | 1643     | 109         | 1478   | 23             | 1.11      | 397       | 9            | 395     | 10              | 1.01       |
| 91  | PTC_14M 2.0 1:5              | II (*)           | 3       | 1744       | 42            | 1774     | 38               | 0.98        | 1660     | 39          | 1520   | 33             | 1.09      | 391       | 4            | 386     | 8               | 1.01       |
| 92  | PLP139-150 1.0               | III (*)          | 3       | 1789       | 1             | 1782     | 15               | 1.00        | 1685     | 21          | 1537   | 9              | 1.10      | 397       | 7            | 398     | 10              | 1.00       |
| 93  | PLP139-150 1.0 1:5           | III (*)          | 3       | 1821       | 33            | 1846     | 29               | 0.99        | 1649     | 12          | 1508   | 16             | 1.09      | 399       | 9            | 397     | 7               | 1.01       |
| 94  | MBP1-11 1.0                  | III (*)          | 3       | 1741       | 12            | 1716     | 8                | 1.01        | 1593     | 17          | 1517   | 23             | 1.05      | 418       | 6            | 413     | 3               | 1.01       |
| 95  | MBP1-11 1.0 1:3              | III (*)          | 3       | 1752       | 5             | 1744     | 4                | 1.00        | 1640     | 28          | 1509   | 19             | 1.09      | 406       | 4            | 408     | 10              | 1.00       |
| 96  | mMBP 0.5                     | III (*)          | 3       | 2209       | 55            | 1853     | 9                | 1.19        | 2006     | 55          | 1523   | 38             | 1.32      | 874       | 7            | 390     | 5               | 2.24       |
| 97  | mMBP 0.5 1:3                 | III (*)          | 3       | 2047       | 27            | 1859     | 9                | 1.10        | 1990     | 164         | 1574   | 39             | 1.26      | 600       | 14           | 400     | 4               | 1.50       |
| 98  | mMBP 0.5 1:9                 | III (*)          | 3       | 1979       | 55            | 1819     | 23               | 1.09        | 1790     | 93          | 1542   | 21             | 1.16      | 416       | 5            | 403     | 5               | 1.03       |
| 99  | hMBP 0.5                     | III (*)          | 3       | 1920       | 21            | 1826     | 9                | 1.05        | 1634     | 21          | 1465   | 9              | 1.12      | 394       | 3            | 395     | 4               | 1.00       |
| 100 | hMBP 0.5 1:3                 | III (*)          | 3       | 1905       | 37            | 1875     | 14               | 1.02        | 1628     | 27          | 1497   | 24             | 1.09      | 391       | 3            | 387     | 4               | 1.01       |
| 101 | hMBP 0.5 1:9                 | III (*)          | 3       | 1980       | 105           | 1982     | 23               | 1.00        | 1845     | 109         | 1540   | 6              | 1.20      | 384       | 4            | 384     | 2               | 1.00       |
| 102 | hMBP 0.5 1:27                | III (*)          | 3       | 1905       | 30            | 1966     | 83               | 0.97        | 1809     | 53          | 1564   | 18             | 1.16      | 387       | 5            | 382     | 2               | 1.01       |
| 103 | MOG 1.0                      | III (*)          | 3       | 1846       | 9             | 1825     | 11               | 1.01        | 1739     | 114         | 1505   | 36             | 1.16      | 397       | 1            | 399     | 5               | 0.99       |
| 104 | MOG 1.0 1:5                  | III (*)          | 3       | 1836       | 18            | 1825     | 28               | 1.01        | 1837     | 208         | 1497   | 25             | 1.23      | 404       | 8            | 403     | 8               | 1.00       |
| 105 | Saline                       |                  | 12      | 1700       | 26            | 1713     | 21               | 0.99        | 1649     | 44          | 1541   | 49             | 1.07      | 410       | 13           | 411     | 12              | 1.00       |

\*Antigen classification: I. Carbohydrate antigens, including polysaccharides, glycoproteins, lipopolysaccharides, and synthetic glycoconjugates;

II. Lipid antigens, including lipids, glycolipids, and liposomes; III. Protein antigens, including proteins and peptides.

(\*) Auto-antigen.
